# Supplementary material for: Risk factors for stroke recurrence in patients with hemorrhagic stroke
Source: Research Square preprint supplement (doi:10.21203/rs.3.rs-1354966/v1), 2022-02-28
Supplement: Supplementary file 1 [file 2a8a2ba81c954343a3a64b24.rtf]

Table 3. The relationships between antiplatelet agent use and 5-year rate of 
stroke recurrence among patients with first-time hemorrhage stroke.		
Variables	Crude HR (95% CI)	Adjusted HR (95% CI)	
Age			
 20–44	Ref.	Ref.	
 45–59	2.31 (1.29–4.17)	2.05 (1.14–3.7)	
 ≥60	3.17 (1.78–5.65)	2.57 (1.43–4.63)	
Sex			
 Female	Ref.	Ref.	
 Male	1.09 (0.89–1.33)	1.17 (0.96–1.44)	
Length of stay, days			
 <9	Ref.	Ref.	
 ≥9	0.77 (0.63–0.95)	0.87 (0.7–1.09)	
ICU			
 No	Ref.	Ref.	
 Yes	0.70 (0.53–0.92)	0.85 (0.75–0.97)	
CCI	1.03 (1.00–1.07)	0.98 (0.94–1.02)	
Antiplatelet agents			
 No	Ref.	Ref.	
 Yes	1.37 (1.12–1.67)	1.17 (0.95–1.43)	
Diabetes mellitus			
 No	Ref.	Ref.	
 Yes	1.30 (1.07–1.59)	1.19 (0.95–1.48)	
Hypertension			
 No	Ref.	Ref.	
 Yes	2.90 (1.67–5.04)	2.23 (1.27–3.91)	
Hyperlipidemia			
 No	Ref.	Ref.	
 Yes	1.16 (0.95–1.41)	1.03 (0.84–1.26)	
AF			
 No	Ref.	Ref.	
 Yes	2.40 (1.68–3.43)	1.87 (1.3–2.7)	
CVD			
 No	Ref.	Ref.	
 Yes	1.70 (1.40–2.08)	1.42 (1.14–1.76)	
CHF			
 No	Ref.	Ref.	
 Yes	1.34 (1.11–1.62)	1 (0.81–1.23)	
The history of IS			
 No	Ref.	Ref.	
 Yes	2.19 (1.51–3.17)	1.6 (1.09–2.36)	
ICU, intensive care unit; CI, confidence interval; AF, atrial fibrillation; 
CHF, congestive heart failure; IS, ischemic stroke; CVD, cardiovascular disease.
